# Supplementary material
Source: Springer Nature journal article supplement (https://www.springermedizin.de/resource/supplementary/12889_2011_3773_MOESM2_ESM.pdf/9489620)

Incidence rate per 100,000 person

years

60  
50  
40  
30  
20  
10  
0

2000-2002

2003-2005

2006-2008

2009

Calendar year

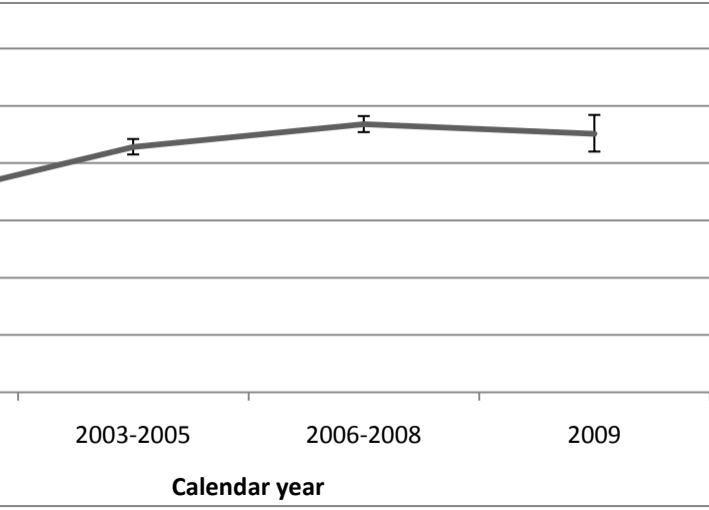

Supplement: MOESM2 [file 9489620]
